# Supplementary material for: Smartphone-assisted microfluidic and spectrophotometric recognition of hydrazine: a new platform towards rapid analysis of carcinogenic agents and environmental technology
Source: Royal Society of Chemistry journal article supplement (doi:10.1039/d2ra07761b), 2023-01-01
Supplement: d2ra07761b9.pdf [file d2ra07761b9.pdf]

## Supporting Information

**Smartphone-assisted microfluidic and spectrophotometric recognition of hydrazine: A new platform towards rapid analysis of carcinogenic agents and environmental technology**

Kambiz Ghaseminasab <sup>a</sup>, Nastaran Aletaha <sup>b</sup>, Mohammad Hasanzadeh <sup>b,c,d</sup>

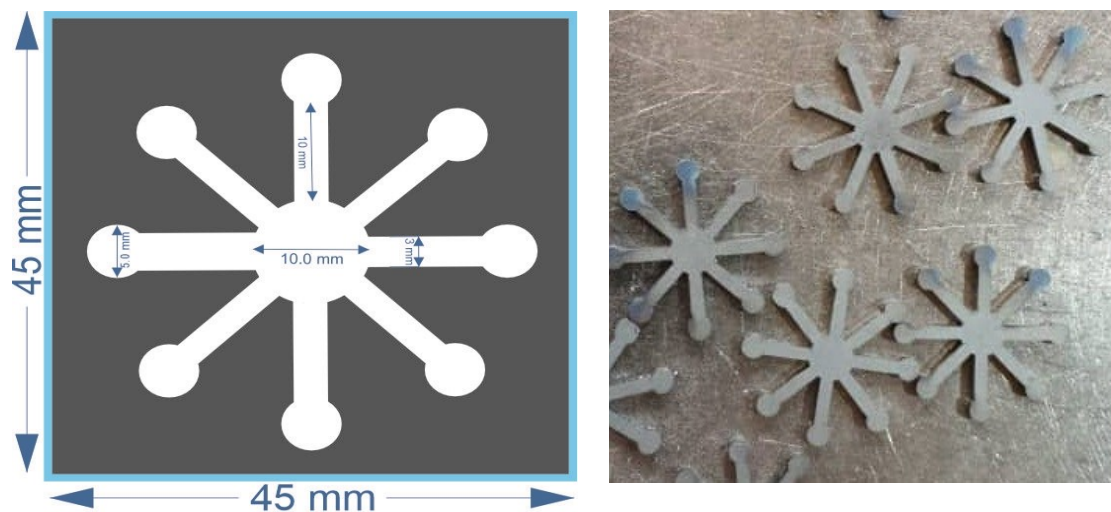

**Scheme. S1.** **A)** Pattern designed by the AutoCAD software to make a stainless-steel mold with dimensions'  $d = 5$  mm for the peripheral circles,  $d = 10$  mm for the central circle, 10 mm for the length of the channels, and 3 mm meters for the width of the channels. **B)** Photographic Images of fabricated steel patterns.

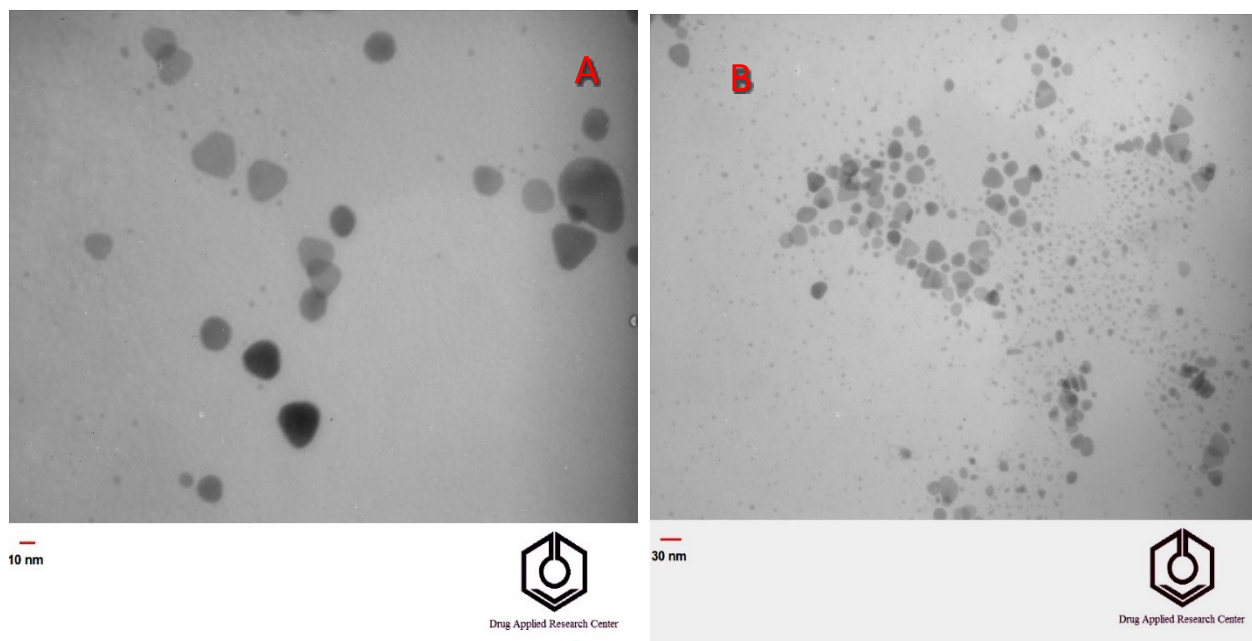

**Fig. S1.** TEM images of Ag NPs in different magnification 10 nm **A)** and 30 nm **B)**

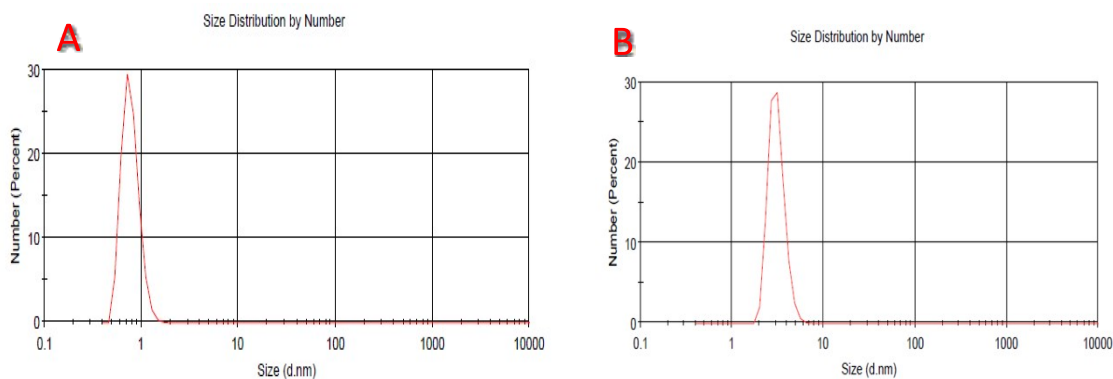

**Fig. S2.** DLS plot of: **A)** Ag NPRs, **B)** combination of Ag NPRs and Hyd (immediately,  $t = 0$ s)

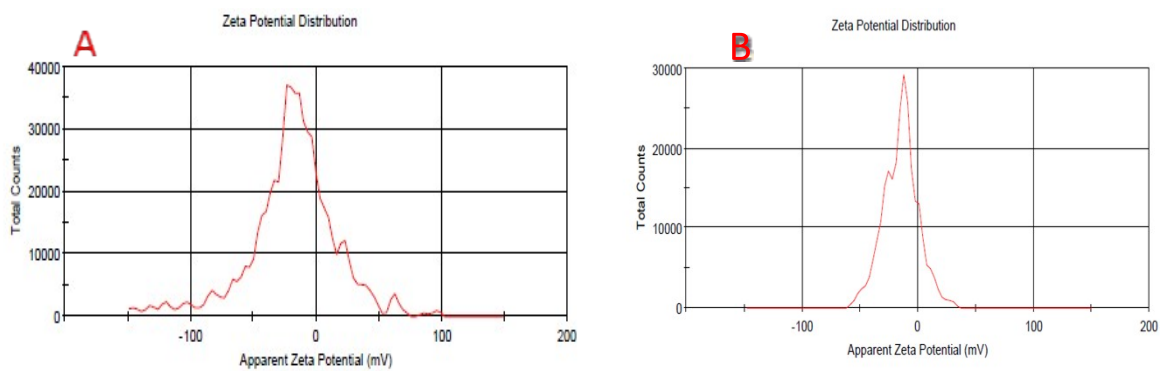

**Fig. S3.** Zeta potential of **A)** Ag NPRs, **B)** combination of Ag NPRs and Hyd (immediately,  $t = 0$ s)

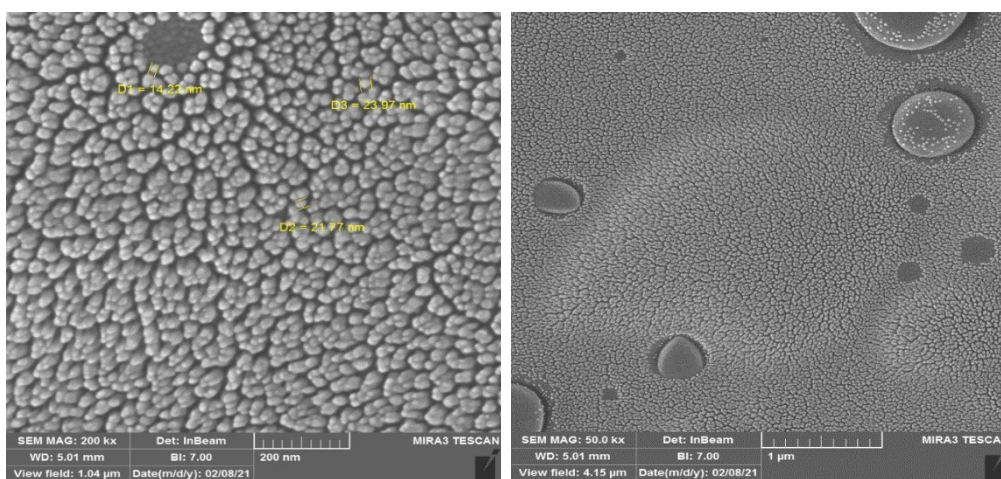

**Fig. S4.** FE-SEM images of Ag NPRs in different magnification.

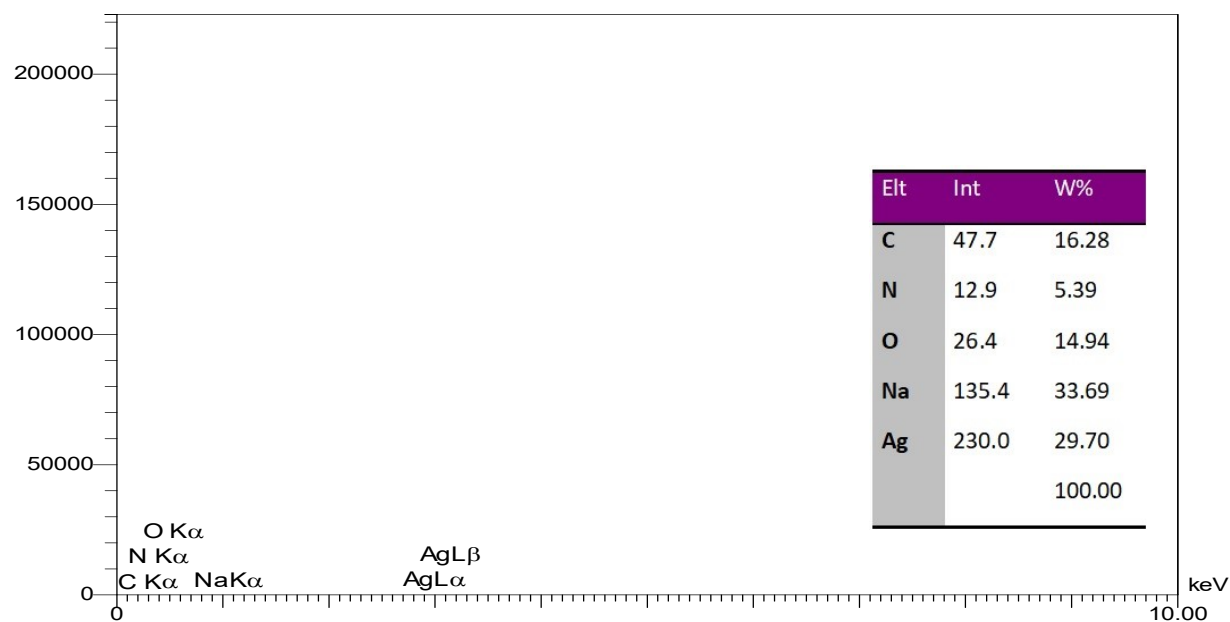

**Fig. S5.** EDS spectra of Ag NPRs.

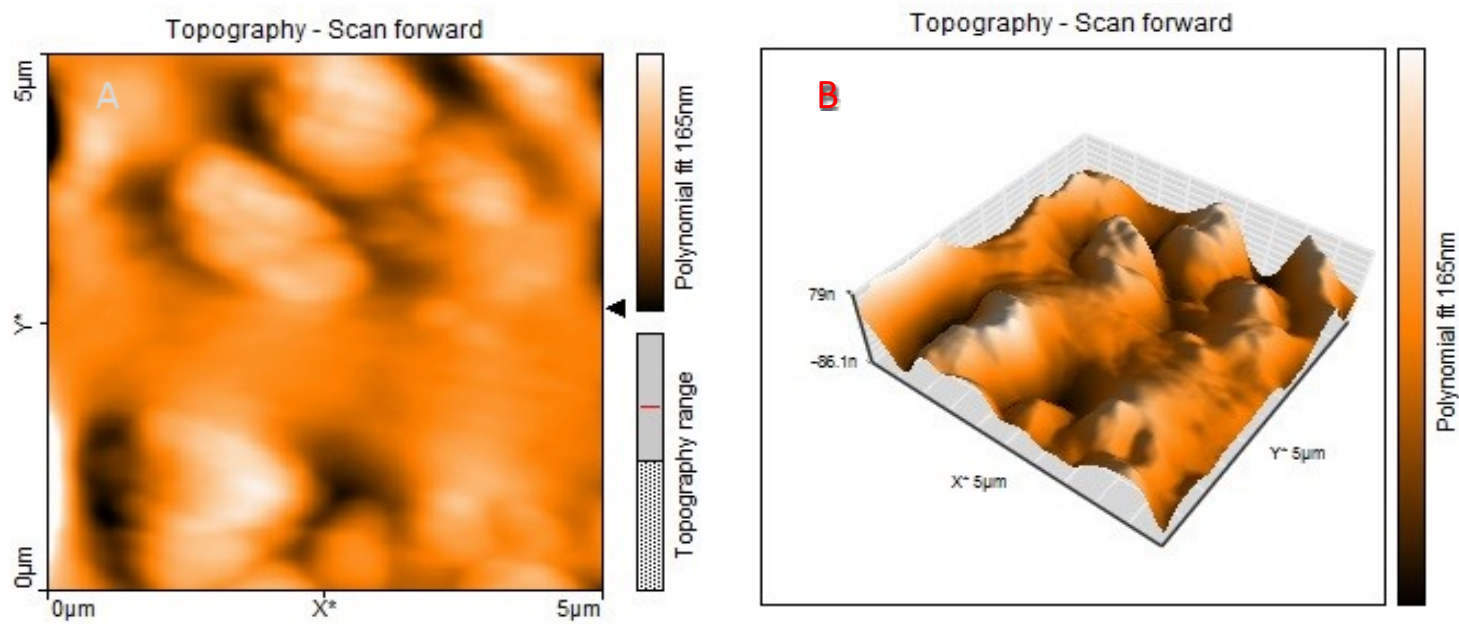

**Fig. S6.** Topographic AFM images of Ag NPRs in 2D, (A) and 3D, (B) view.

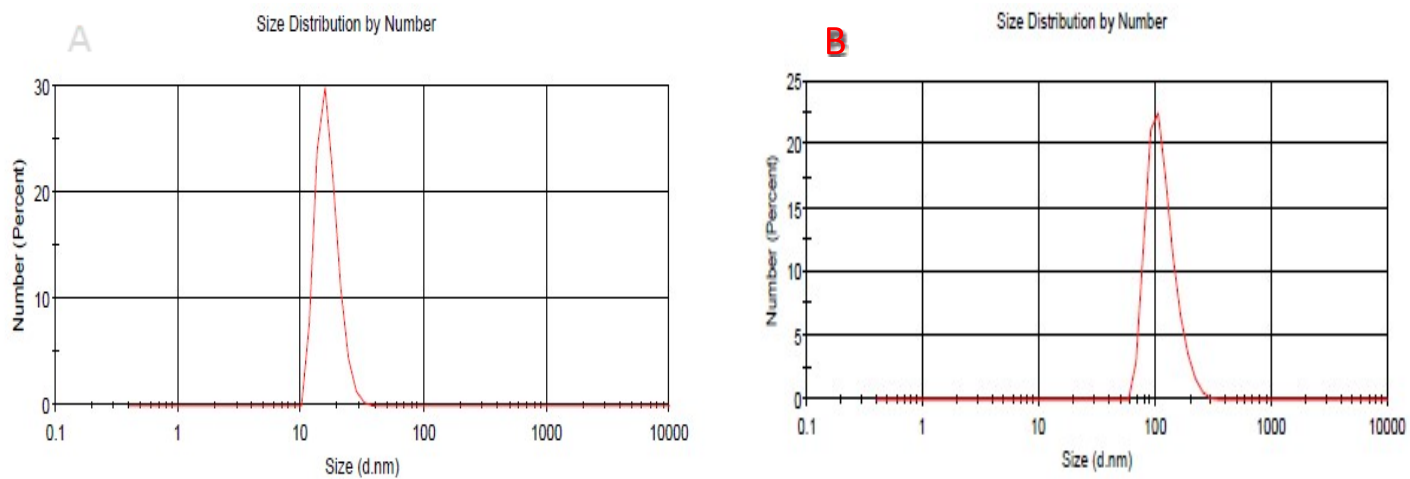

**Fig. S7.** DLS plot of **A)** Ag NWs, **B)** combination of Ag NWs and Hyd (immediately,  $t = 0$ s)

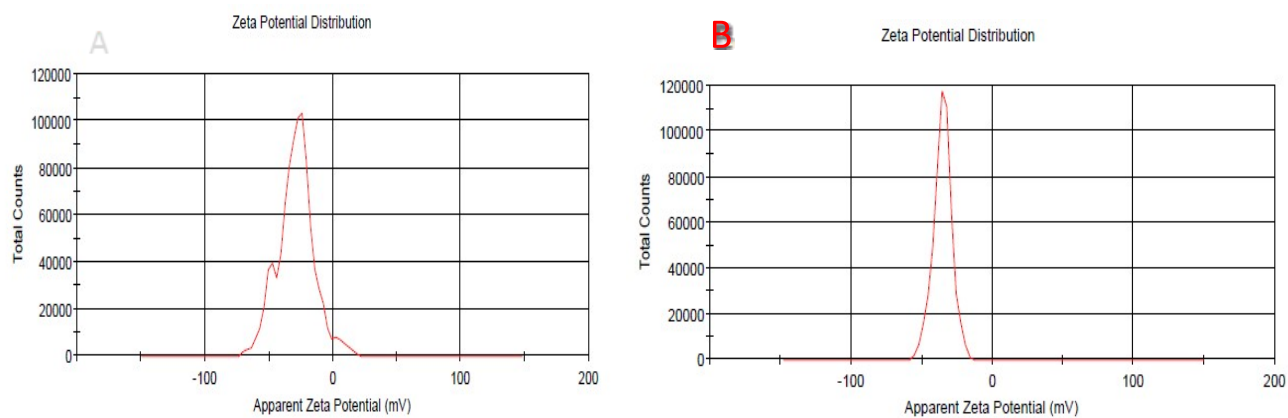

**Fig. S8.** Zeta potential of **(A)** Ag NWs, **(B)** combination of Ag NWs and Hyd (immediately,  $t = 0$ s)

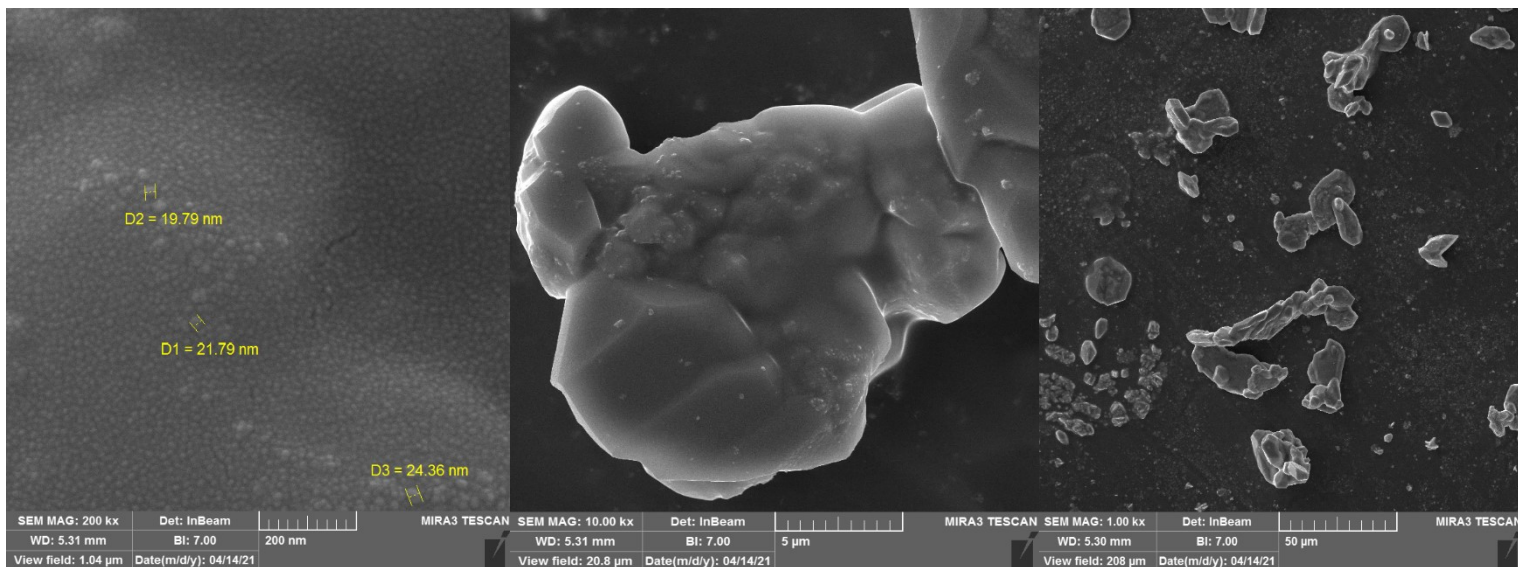

**Fig. S9.** FE-SEM images of Ag NWs in different magnification.

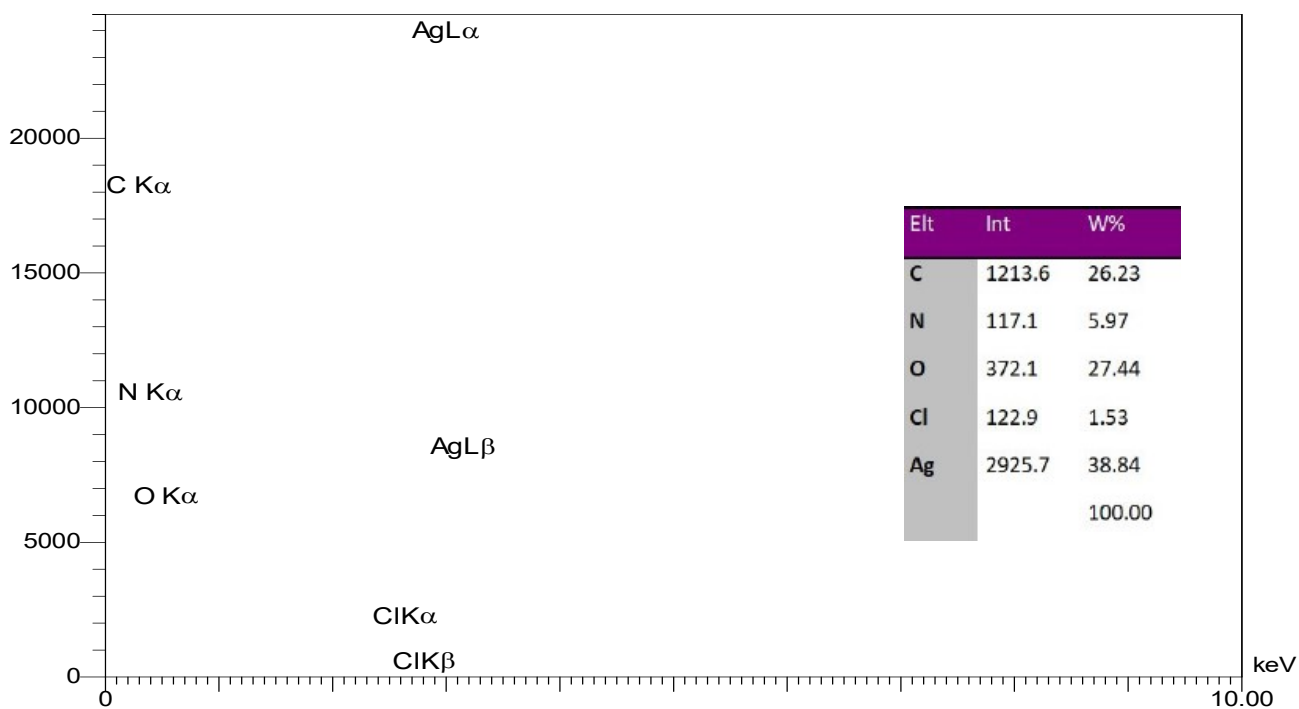

**Fig. S10.** EDS spectra of Ag NWs.

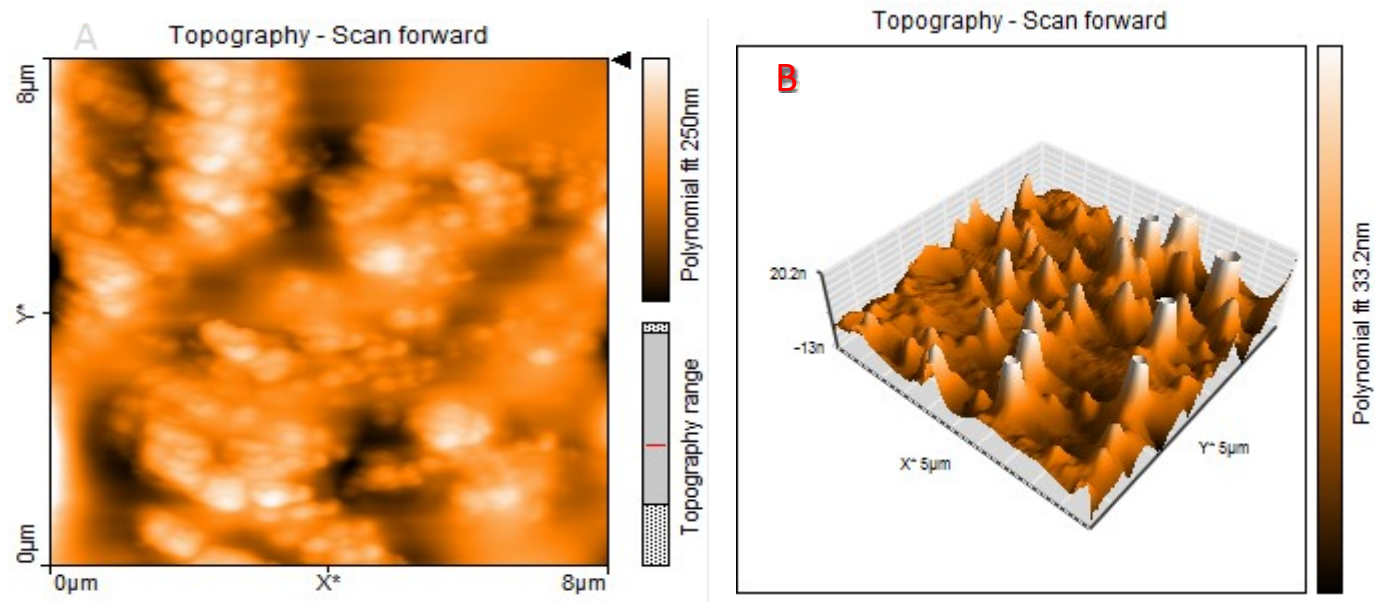

**Fig. S11.** Topographic AFM images in 2D, (A) and 3D, (B) view of Ag NWs.

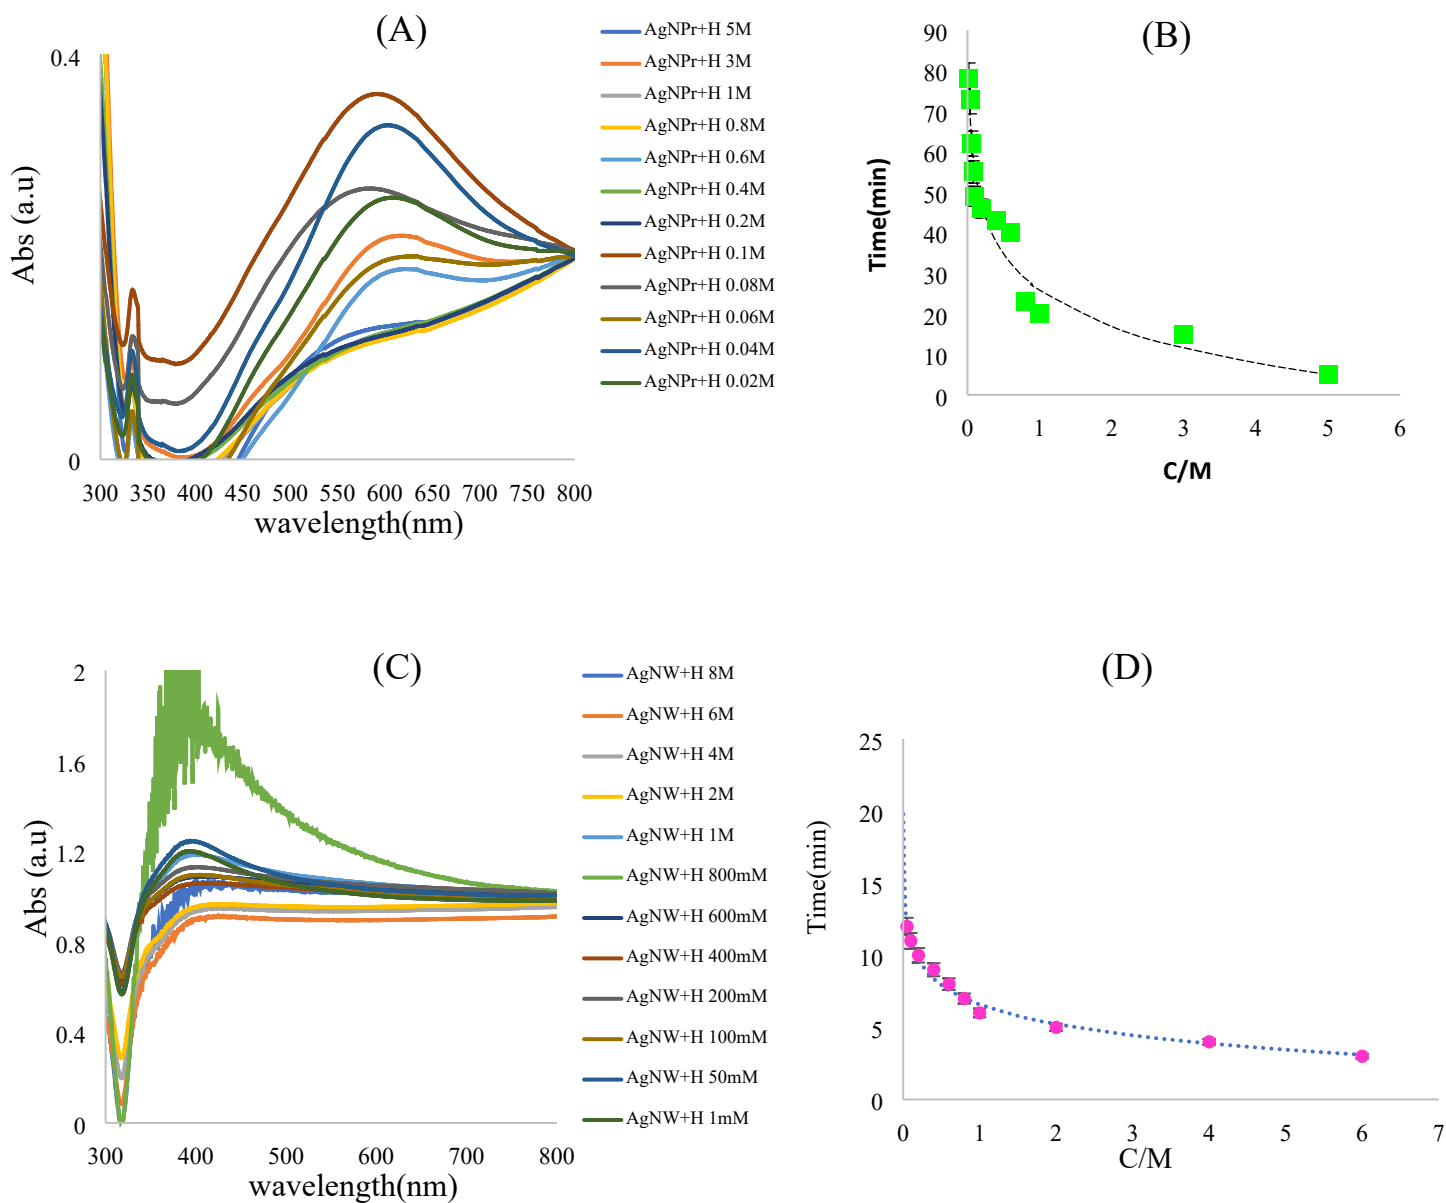

**Fig. S12. A, C)** UV-Vis spectra of different concentrations of Hyd in the presence of optical probes (AgNPrs, AgNWs), respectively. **B, D)** Dependency of reaction time versus different concentrations of Hyd



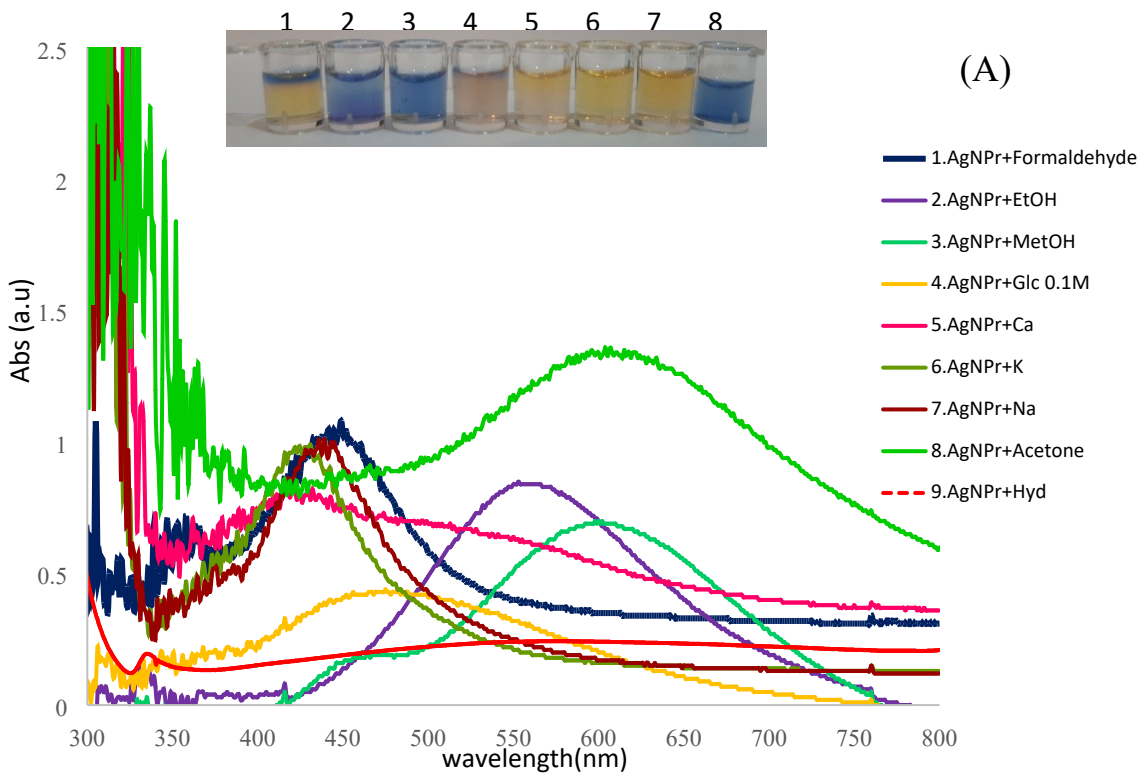

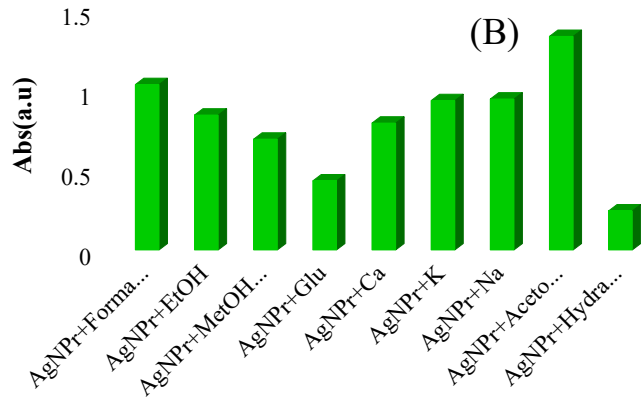

Type of reagent

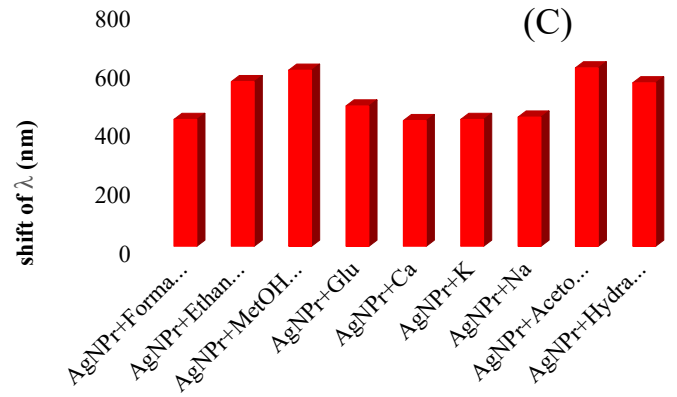

Type of reagent

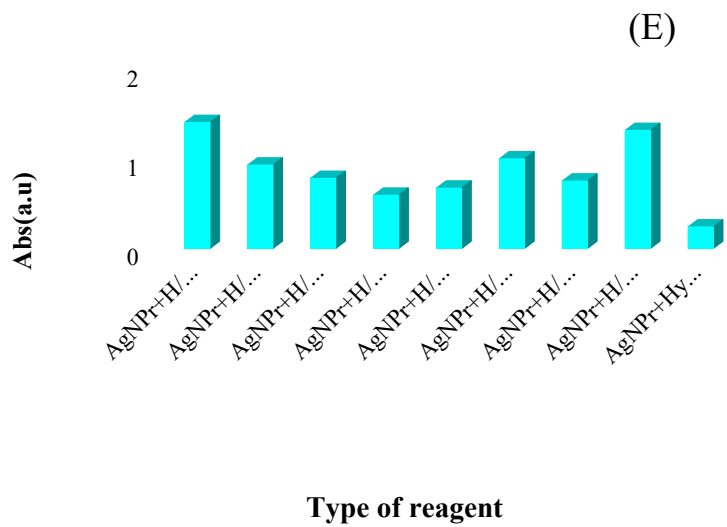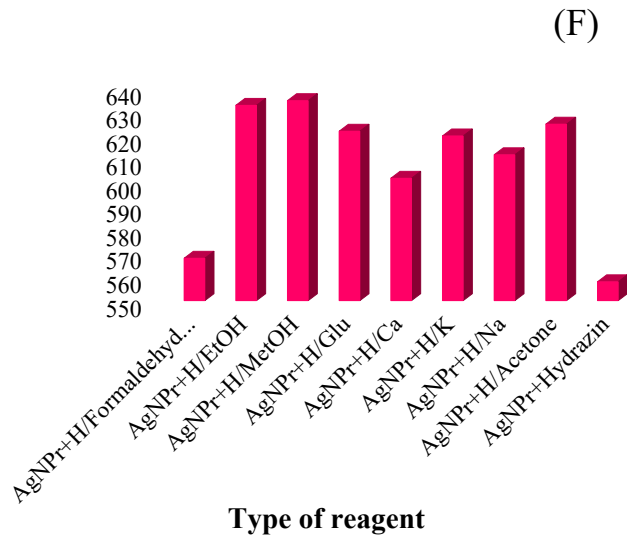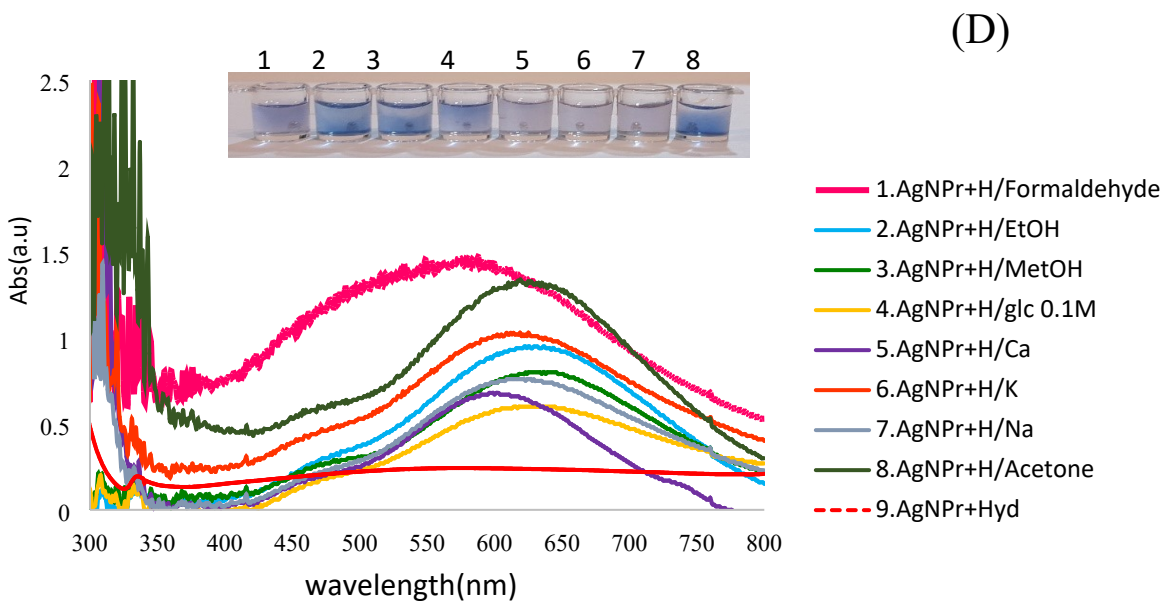

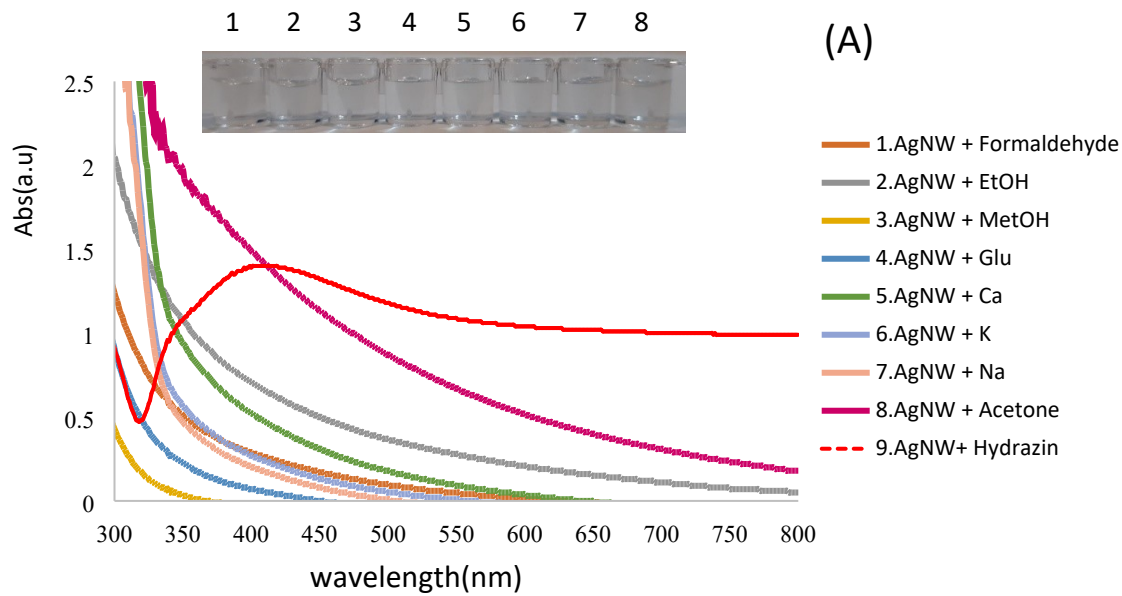

**Fig. S13.** photographic images and spectroscopic UV-Vis graphs of: **A)** AgNPr/Formaldehyde, AgNPr/EtOH, AgNPr/MetOH, AgNPr/Glu, AgNPr/Ca, AgNPr/K, AgNPr/Na, AgNPr/Acetone. **D)** AgNPr/(Formaldehyde+H), AgNPr/(EtOH+H), AgNPr/(MetOH+H), AgNPr/ (Glu+H), AgNPr/(Ca+H), AgNPr/(K+H), AgNPr/(Na+H), AgNPr/(Acetone+H). **B, E)** UV-Vis absorption response versus type of reagents. **C, F)** histogram of wavelength changes versus type of reagents.

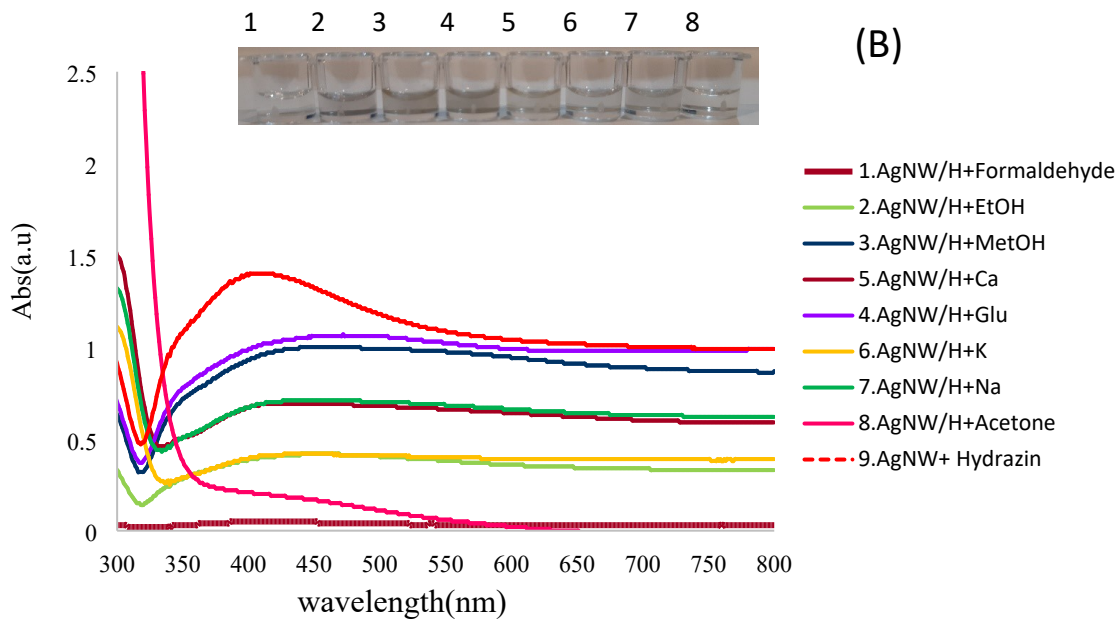

**Fig. S14.** photographic images and Spectroscopic UV-Vis graph of: **A)** AgNWs/Formaldehyde, AgNWs/EtOH, AgNWs/MetOH, AgNWs/Glu, AgNWs/Ca, AgNWs/K, AgNWs/Na, AgNWs/Acetone. **B)** AgNWs/(Formaldehyde+Hyd), AgNWs/(EtOH+ Hyd), AgNWs/(MetOH+ Hyd), AgNWs/(Glu+ Hyd), AgNWs/(Ca+ Hyd), AgNWs/(K+ Hyd), AgNWs/(Na+ Hyd), AgNWs/(Acetone+ Hyd).

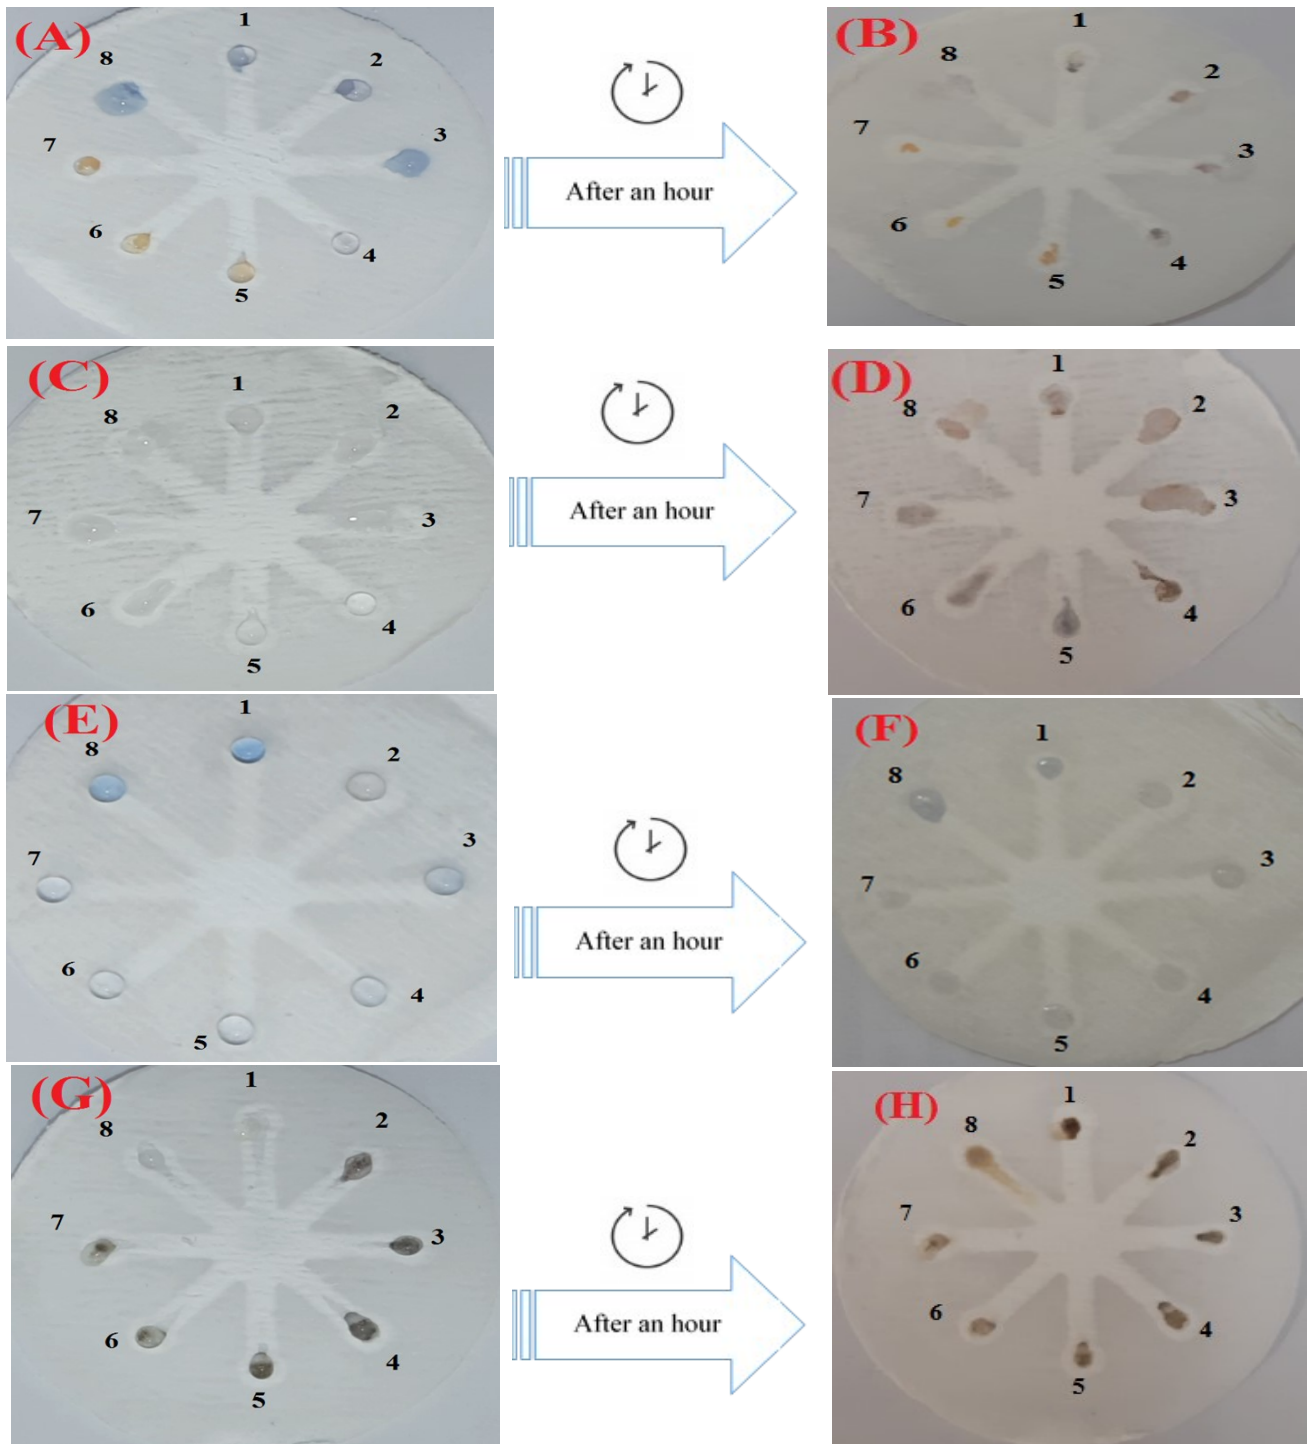

**Fig. S15.** Photographic images of the  $\mu$ PCD-based calorimetric sensor: **A, D)** Interaction between AgNPs and AgNWs with (Formaldehyde, EtOH, MetOH, Glu, Ca, K, Na, and Acetone) zones 1 to 8, respectively before and after an hour. **C, G)** Interaction between AgNPs and AgNWs with (Formaldehyde+Hyd, EtOH+Hyd, MetOH+Hyd, Glu+Hyd, Ca+Hyd, K+Hyd, Na+Hyd, and Acetone+Hyd) zones 1 to 8, respectively before and after an hour.

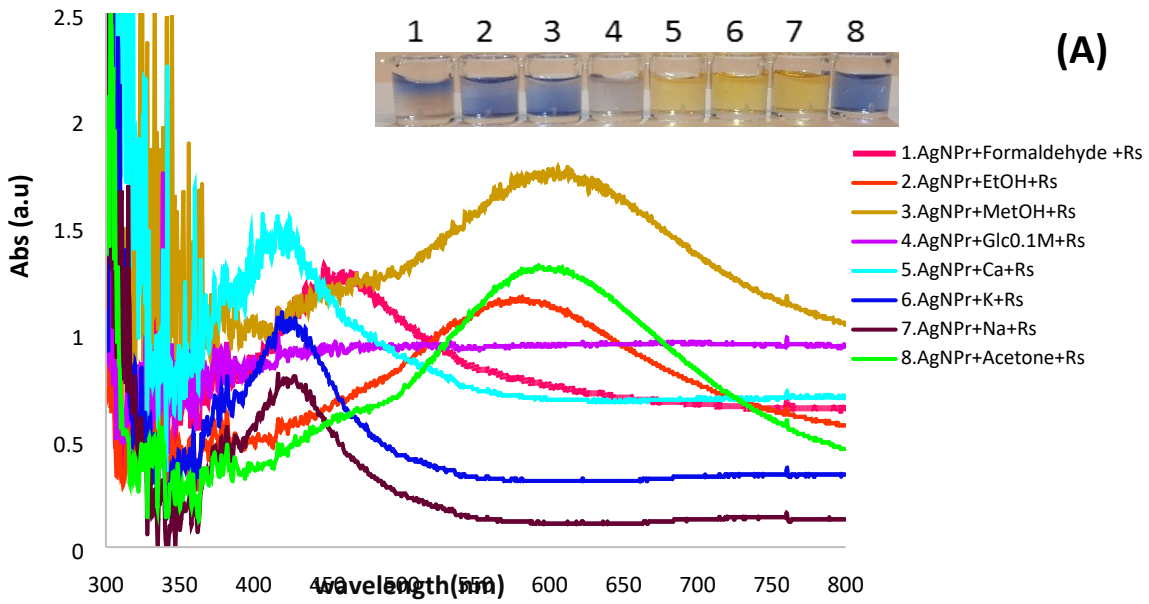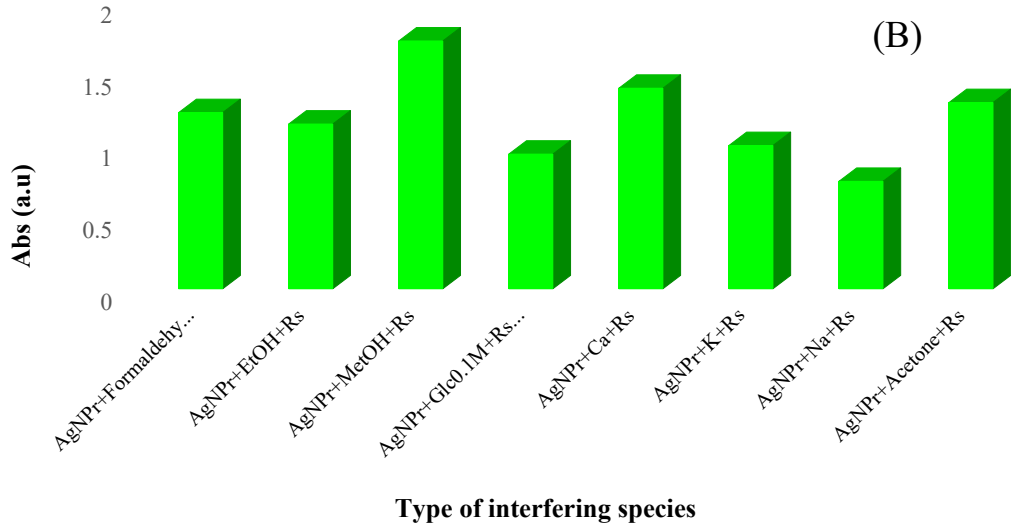

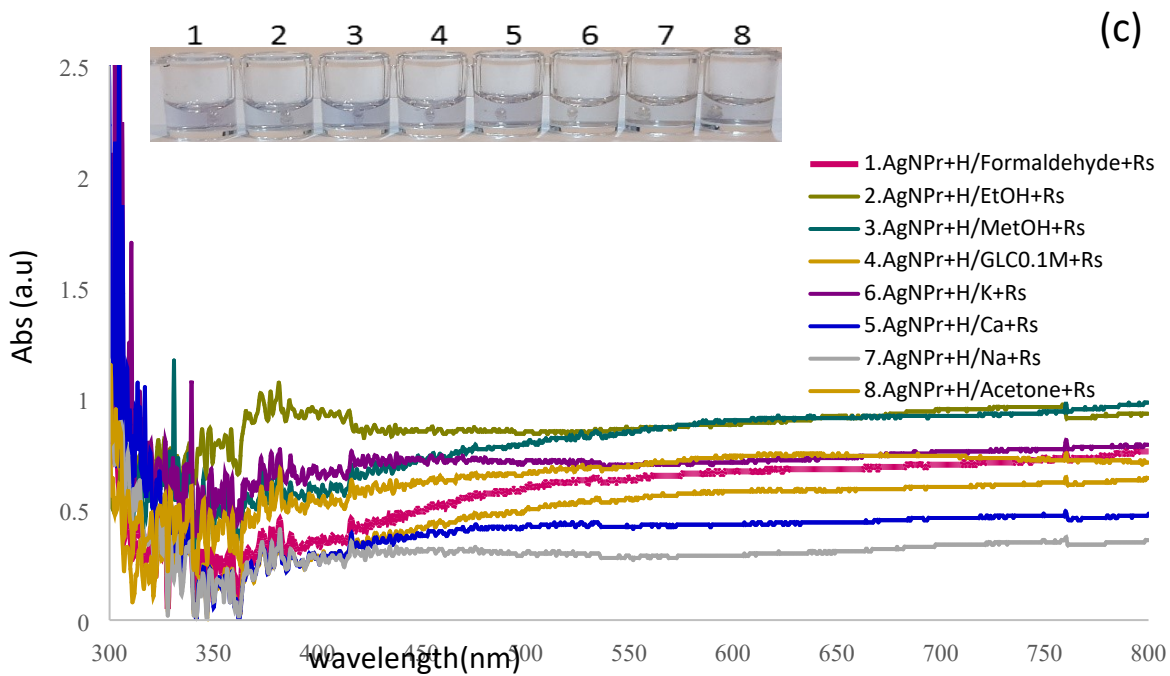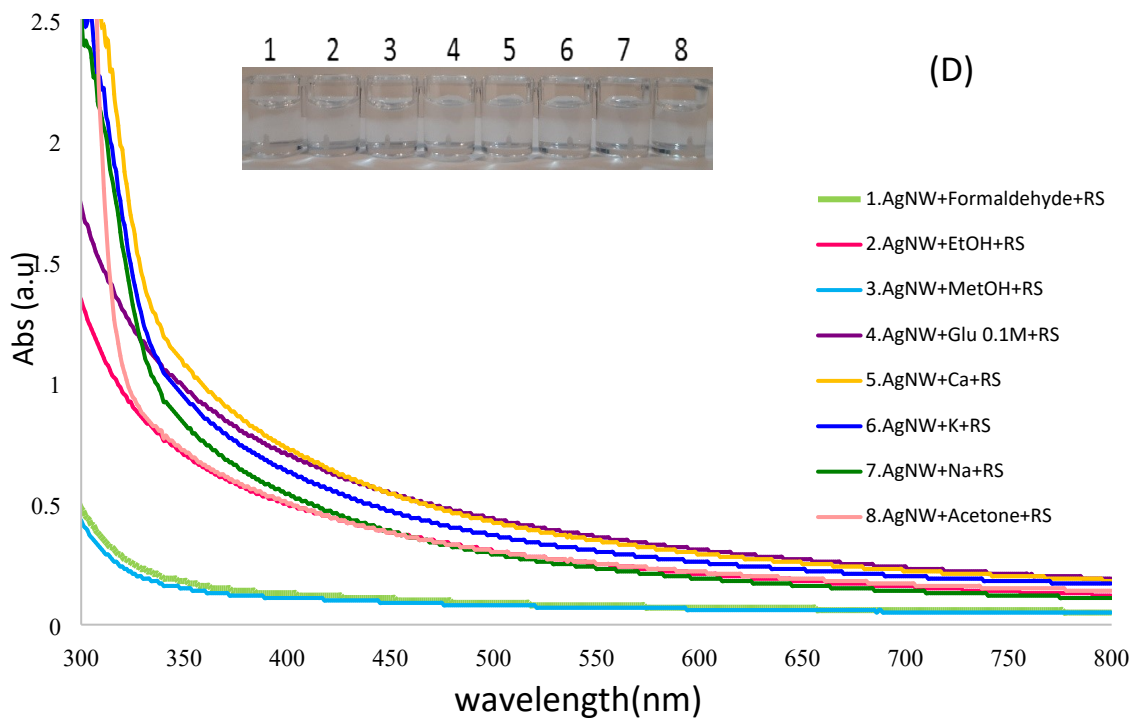



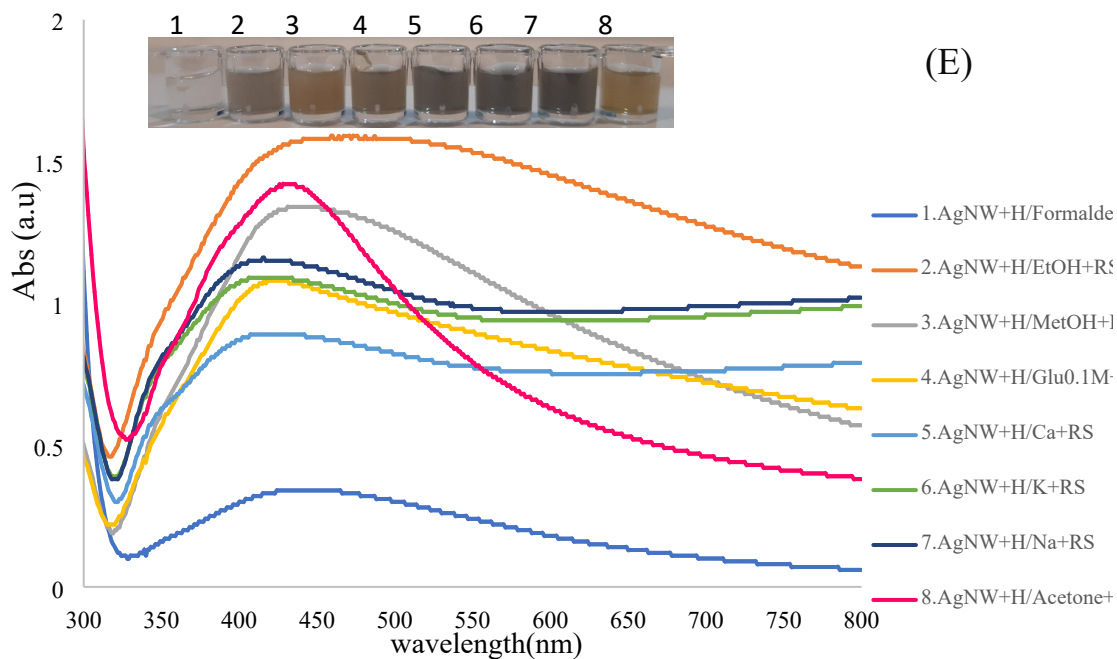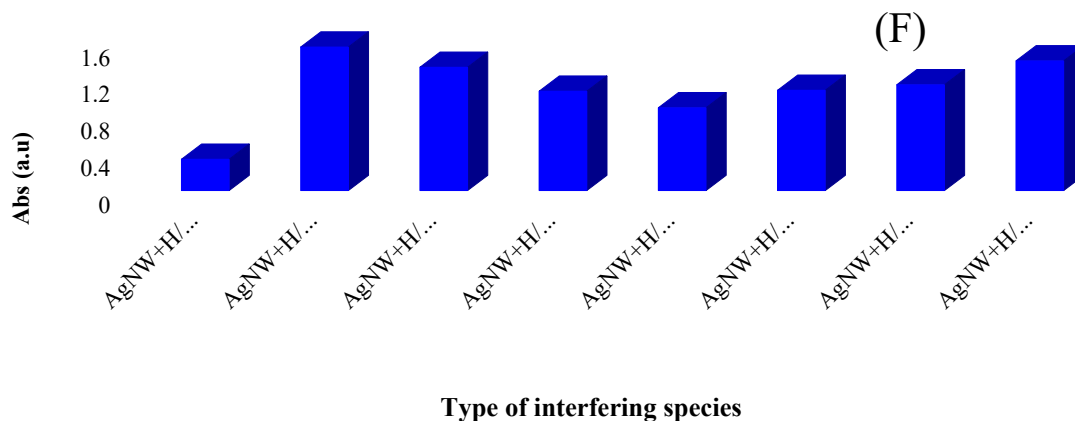

**Fig. S16.** photographic images and spectroscopic UV-Vis graphes of: **A)** AgNPr/Formaldehyde+Rs, AgNPr/EtOH+Rs, AgNPr/MetOH+Rs, AgNPr/Glu+Rs, AgNPr/Ca+Rs, AgNPr/K+Rs, AgNPr/Na+Rs, AgNPr/Acetone+Rs. **C)** AgNPr/(H/Formaldehyde+Rs), AgNPr/(H/EtOH+Rs), AgNPr/(H/MetOH+Rs), AgNPr/(H/Glu+Rs), AgNPr/(H/Ca+Rs), AgNPr/(H/K+Rs), AgNPr/(H/Na+Rs), AgNPr/(H/Acetone+Rs). **D)** AgNWs/Formaldehyde+Rs, AgNWs/EtOH+Rs, AgNWs /MetOH+Rs, AgNWs/Glu+Rs, AgNWs/Ca+Rs, AgNWs/K+Rs, AgNWs/Na+Rs, AgNWs/Acetone+Rs. **E)** AgNWs/(H/Formaldehyde+Rs), AgNWs/(H/EtOH+Rs), AgNWs/(H/MetOH+Rs), AgNWs/(H/Glu+Rs), AgNWs/(H/Ca+Rs), AgNWs/(H/K+Rs), AgNWs/(H/Na+Rs), AgNWs/(H/Acetone+Rs). **B, F)** UV-Vis absorption response versus type of reagents.

**Fig. S17.** Photographic images of the  $\mu$ PCD-based calorimetric sensor: **A, D)** Interaction between AgNPrs and AgNWs with (Formaldehyde/Rs, EtOH/Rs, MetOH/Rs, Glu/Rs, Ca/Rs, K/Rs, Na/Rs, and Acetone/Rs) zones 1 to 8, respectively before and after an hour. **C, G)** Interaction between AgNPrs and AgNWs with (Formaldehyde/Rs+H, EtOH/Rs+H, MetOH/Rs+ Hyd, Glu/Rs+Hyd, Ca/Rs+ Hyd, K/Rs+ Hyd, Na/Rs+ Hyd, and Acetone/Rs+ Hyd) zones 1 to 8, respectively before and after an hour.

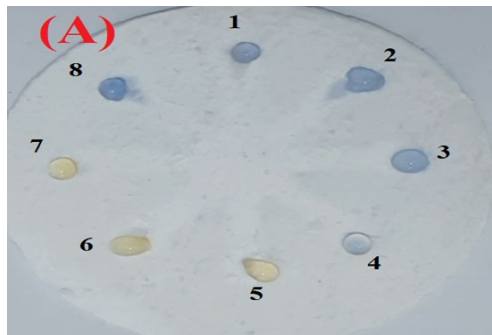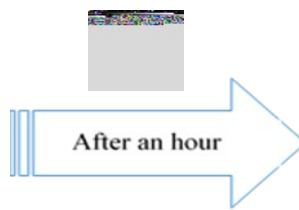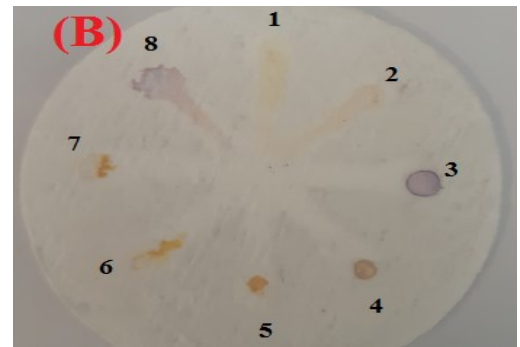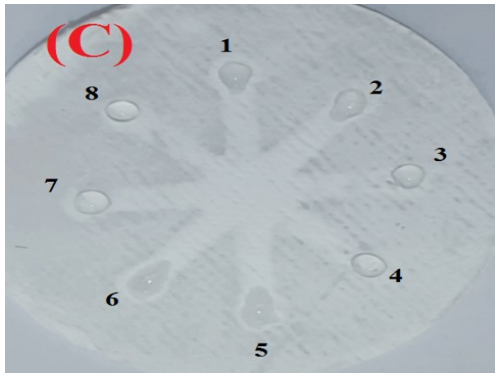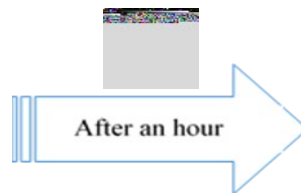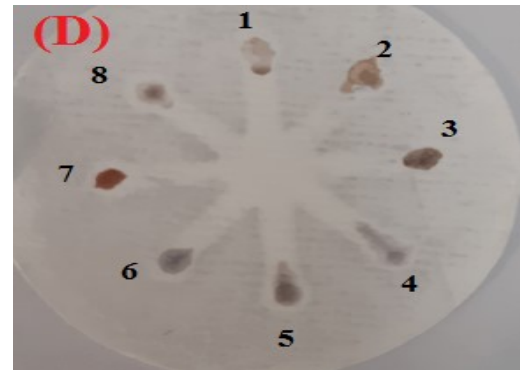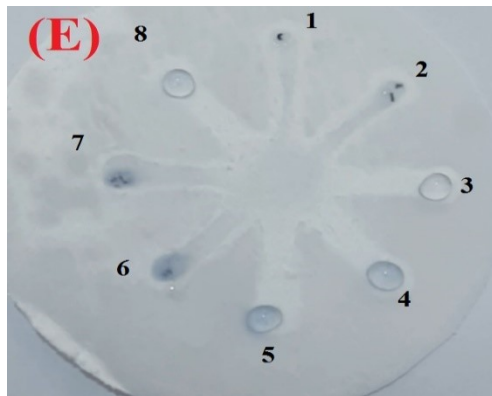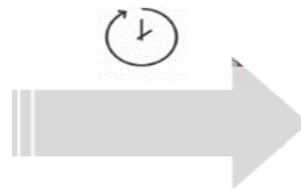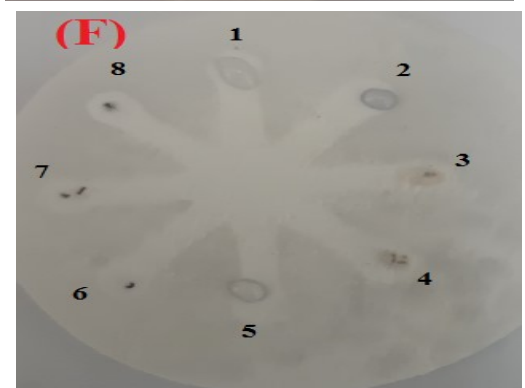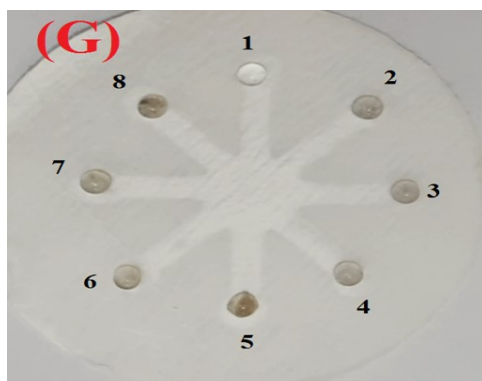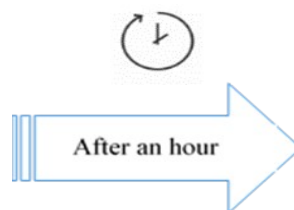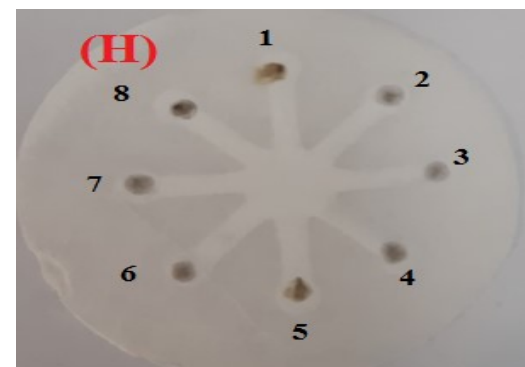

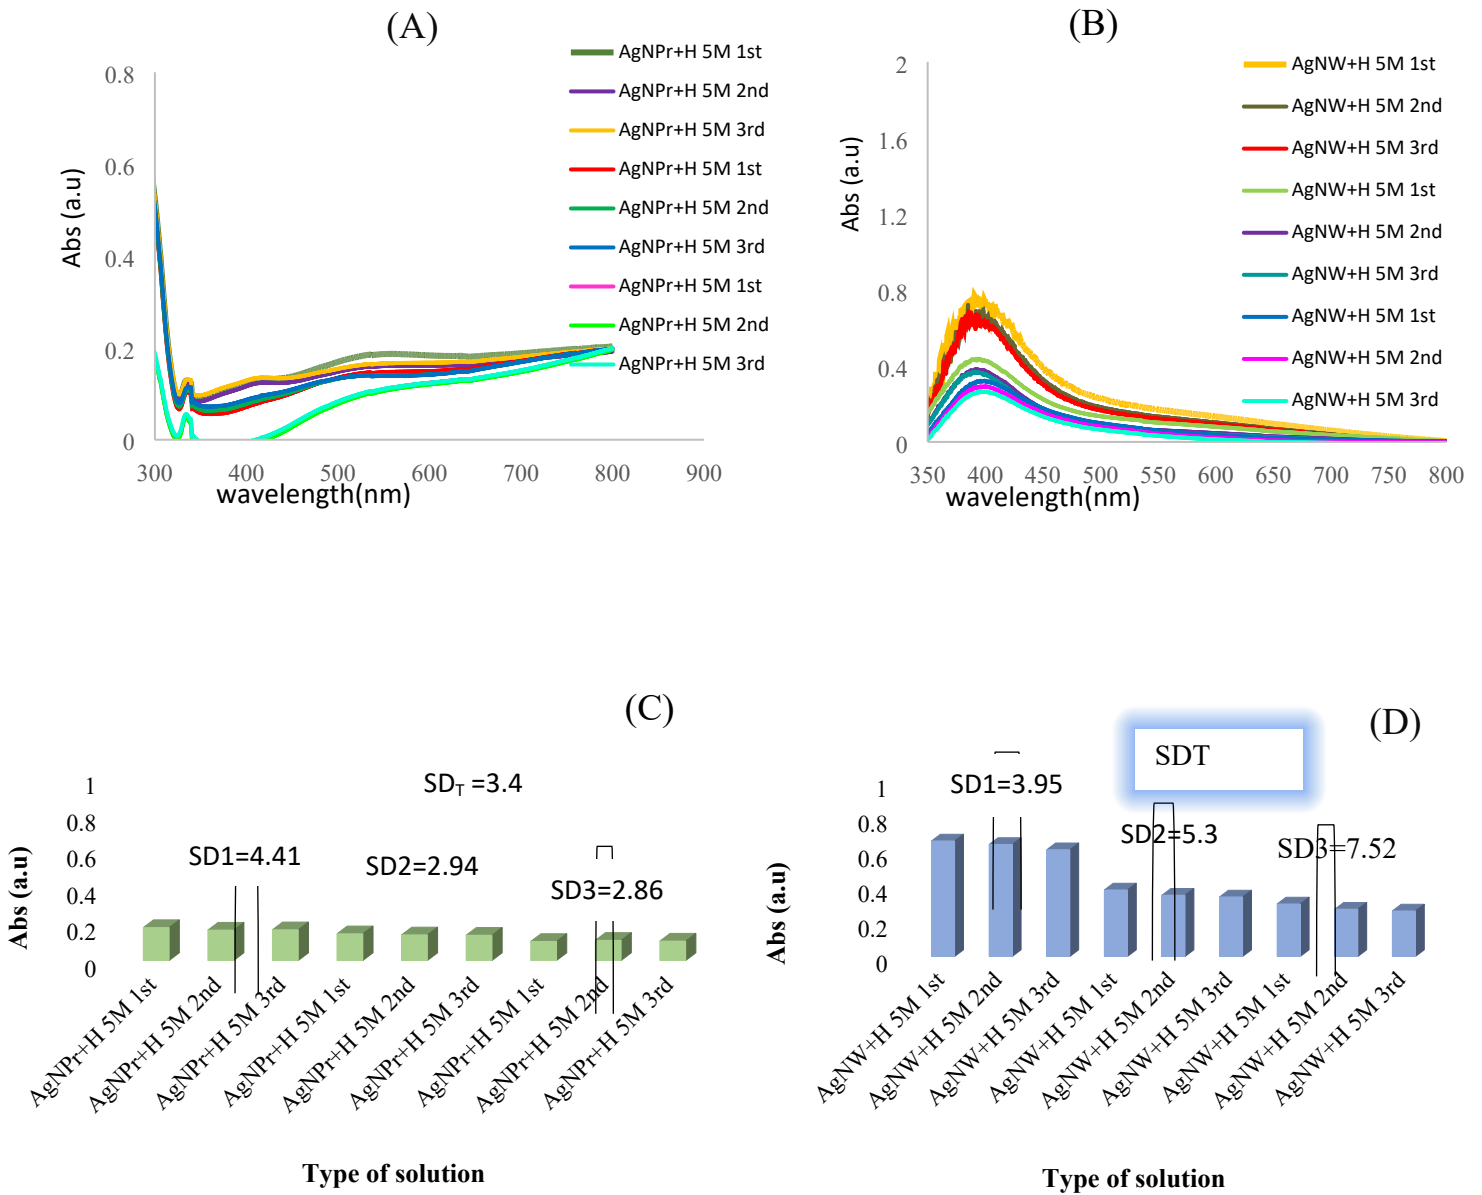

**Fig. S18.** Spectroscopic UV-Vis graphes record of the interaction of: **A)** AgNPs **B)** AgNWs with 5M Hyd with three repeats, respectively; **C, D)** Histogram of Abs (A.u) versus type of solution.

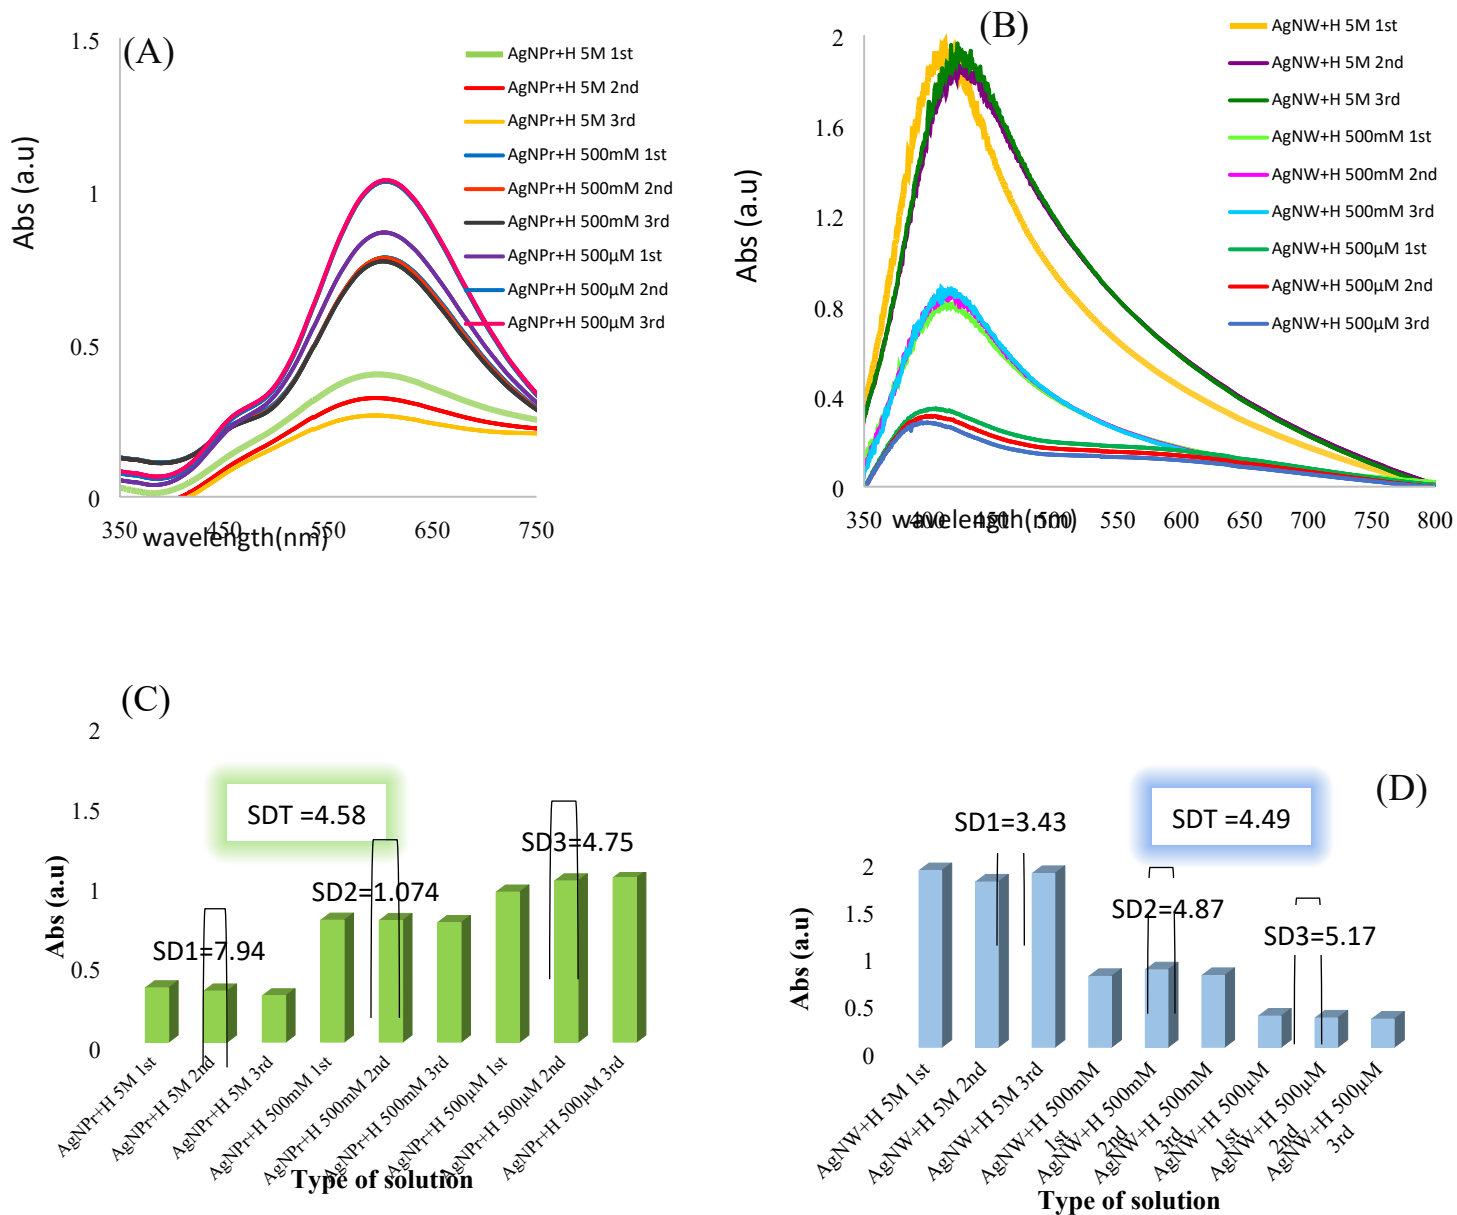

**Fig. S19.** Spectroscopic record of the interaction of: **A)** AgNPrs, **B)** AgNWs with various concentrations of Hyd (5M, 500mM, 500μM); **C, D)** the absorbance of the reaction (A and B) in three repeats at the different concentrations, respectively.

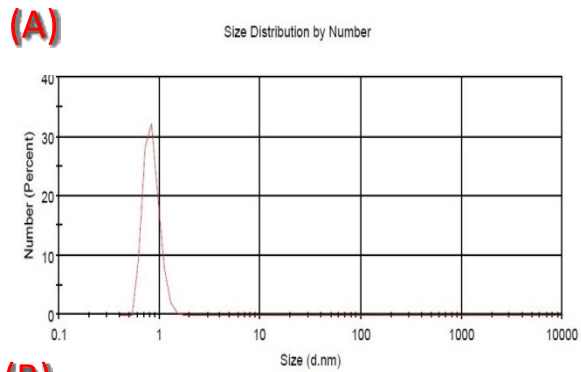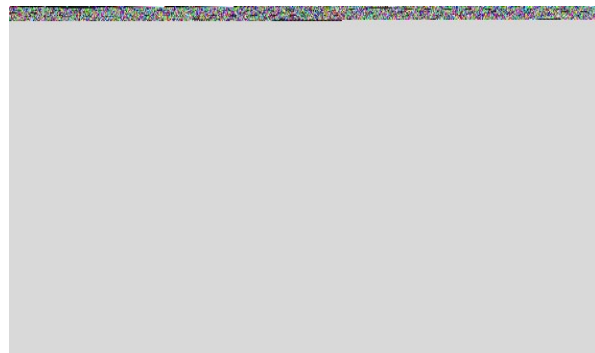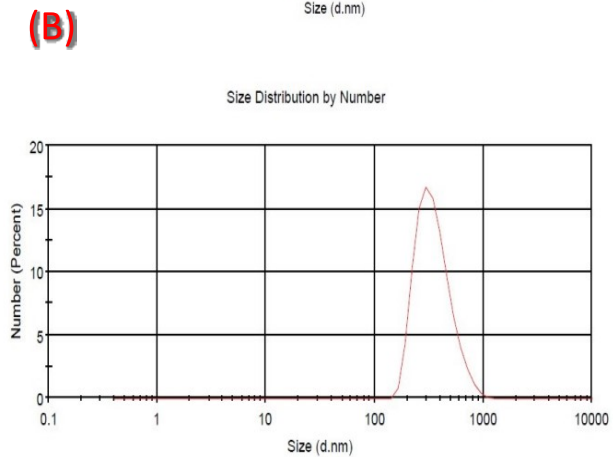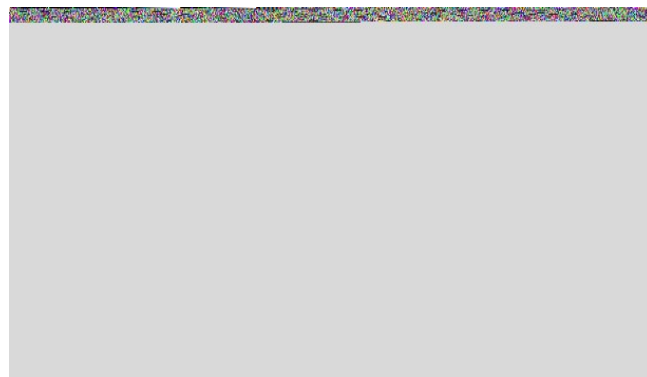

**Fig. S20.** DLS plote of A) Ag NPrs, B) AgNWs before and after 3 month.

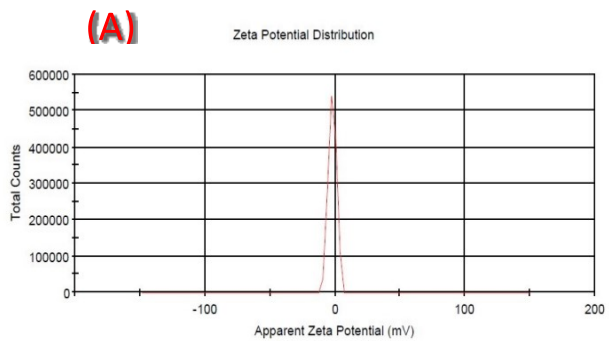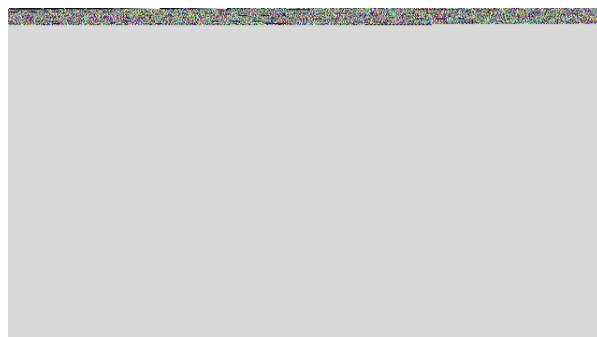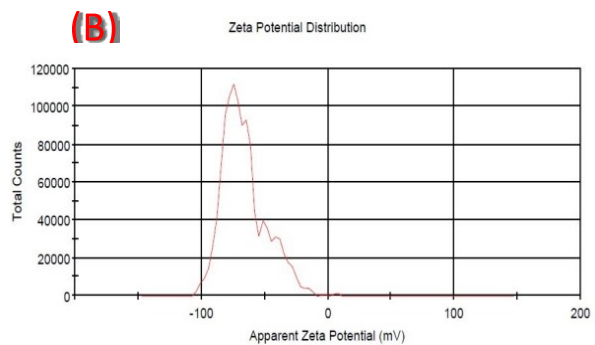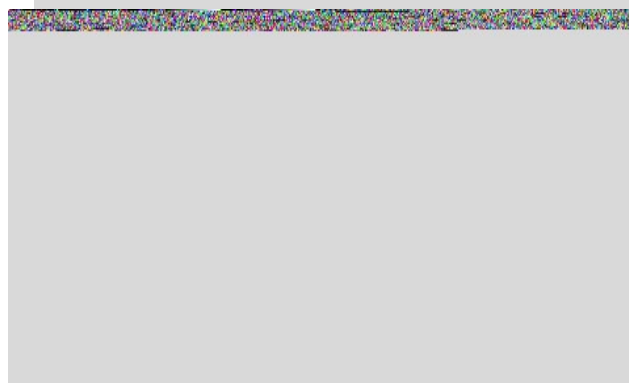

**Fig. S21.** Zeta potential of A) Ag NPrs, B) AgNWs before and after 3 months.

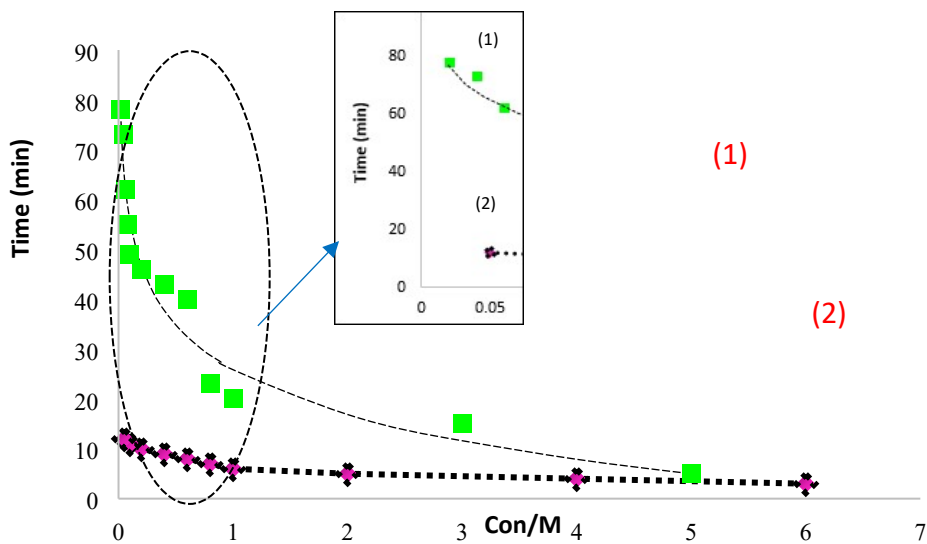

**Fig. S22.** Calibration curve of detection time versus different concentrations of Hyd in the presence of optical probes (1) AgNPrs and (2) AgNWs.
